# Supplementary material for: Flexible wire-shaped strain sensor from cotton thread for human health and motion detection
Source: PubMed Central journal article supplement (PMC5359581; doi:10.1038/srep45013), 2017-03-21
Supplement: srep45013-s1.pdf [file srep45013-s1.pdf]

# Flexible wire-shaped strain sensor from cotton thread for human health and motion detection

Yuan-Qing Li<sup>1</sup>, Pei Huang<sup>1</sup>, Wei-Bin Zhu<sup>1</sup>, Shao-Yun Fu<sup>1\*</sup>, Ning Hu<sup>1,2</sup>, and Kin Liao<sup>3\*</sup>

<sup>1</sup>College of Aerospace Engineering, Chongqing University, Chongqing 400044, P. R. China.

<sup>2</sup>The State Key Laboratory of Mechanical Transmissions, Chongqing University, Chongqing 400044, P. R. China

<sup>3</sup>Department of Mechanical Engineering, Khalifa University of Science, Technology, & Research, Abu Dhabi 127788, United Arab Emirates.

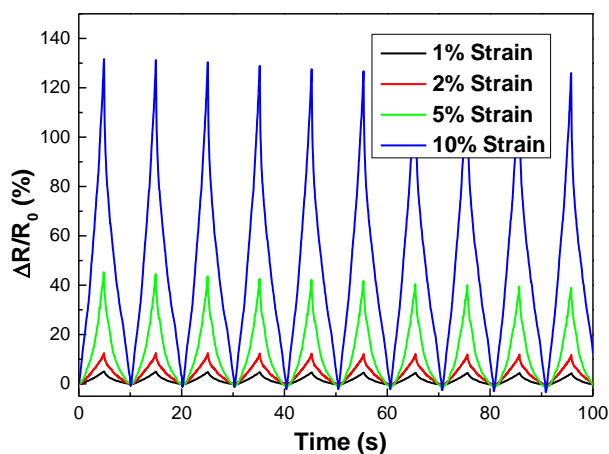

Figure S1. RCR response of the CT/PDMS composite wire to different cyclic strain.

---

Correspondence and requests for materials should be address to S.-Y.F. (syfu@cqu.edu.cn) or K.L. (kin.liao@kustar.ac.ae)

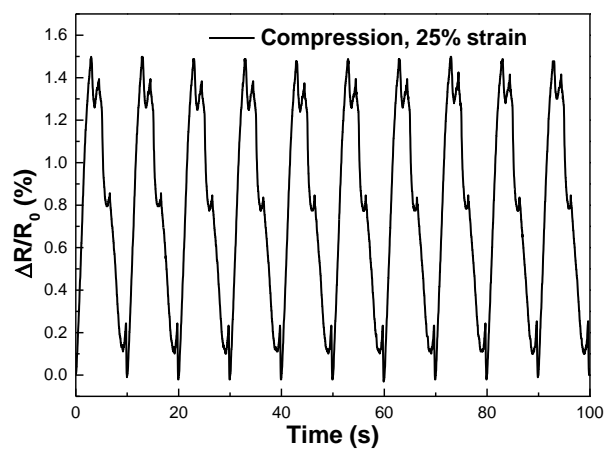

(A)

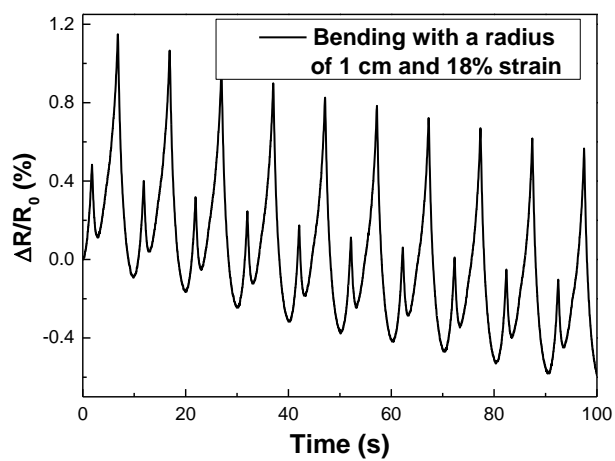

(B)

Figure S2. RCR response of the CT/PDMS composite wire to cyclic compressive (A) and bending (B) strain.
